# Supplementary material for: Transcriptome Analyses of Barley Roots Inoculated with Novel Paenibacillus sp. and Erwinia gerundensis Strains Reveal Beneficial Early-Stage Plant–Bacteria Interactions
Source: MDPI journal article supplement (doi:10.3390/plants10091802), 2021-08-30
Supplement: s1 [file s1]

Supplementary Table S1. Yield (number of clean reads) generated by transcriptome sequencing

|          | Sample ID    | Strain ID                        | Treatment                       | Medium                          | No. of clean reads (Million) |  |
|----------|--------------|----------------------------------|---------------------------------|---------------------------------|------------------------------|--|
| Bacteria | AR-C-NB-1    | AR<br><i>Erwinia gerundensis</i> | control<br>(no barley seedling) | Nutrient Broth                  | 134.4                        |  |
|          | AR-C-NB-2    |                                  | with barley seedlings           |                                 | 98.7                         |  |
|          | AR-C-NB-3    |                                  |                                 |                                 | 138.6                        |  |
|          | AR-B-NB-1    |                                  |                                 |                                 | 121.4                        |  |
|          | AR-B-NB-2    |                                  |                                 |                                 | 145.9                        |  |
|          | AR-B-NB-3    |                                  |                                 |                                 | 106.0                        |  |
|          | P25-C-NB-1   | S25<br><i>Paenibacillus</i> sp.  | control<br>(no barley seedling) | Nutrient Broth                  | 31.8                         |  |
|          | P25-C-NB-2   |                                  | with barley seedlings           |                                 | 29.4                         |  |
|          | P25-C-NB-3   |                                  |                                 |                                 | 29.1                         |  |
|          | P25-B-NB-1   |                                  |                                 |                                 | 110.3                        |  |
|          | P25-B-NB-2   |                                  |                                 |                                 | 91.6                         |  |
|          | P25-B-NB-3   |                                  |                                 |                                 | 90.5                         |  |
|          | P02-C-NB-1   | S02<br><i>Paenibacillus</i> sp.  | control<br>(no barley seedling) | Burk's N-free                   | 26.7                         |  |
|          | P02-C-NB-2   |                                  | with barley seedlings           |                                 | 30.8                         |  |
|          | P02-C-NB-3   |                                  |                                 |                                 | 41.7                         |  |
|          | P02-B-NB-1   |                                  | with barley seedlings           | Burk's N-free                   | 29.4                         |  |
|          | P02-B-NB-2   |                                  |                                 |                                 | 44.8                         |  |
|          | P02-B-NB-3   |                                  |                                 |                                 | 62.4                         |  |
|          | P02-Bu-1     |                                  | control<br>(no barley seedling) |                                 | 17.7                         |  |
|          | P02-Bu-2     |                                  | with barley seedlings           |                                 | 26.0                         |  |
|          | P02-Bu-3     |                                  |                                 |                                 | 16.2                         |  |
|          | P02-B-Bu-1   |                                  |                                 |                                 | 4.9                          |  |
|          | P02-B-Bu-2   |                                  |                                 |                                 | 22.2                         |  |
|          | P02-B-Bu-3   |                                  |                                 |                                 | 30.1                         |  |
| Plant    | B-C-NB-r-1   | N/A                              | control<br>(no bacteria)        | Nutrient Broth                  | 155.6                        |  |
|          | B-C-NB-r-2   |                                  |                                 | Burk's N-free                   | 154.5                        |  |
|          | B-C-NB-r-3   |                                  |                                 |                                 | 137.7                        |  |
|          | B-C-Bu-r-1   |                                  |                                 |                                 | 122.8                        |  |
|          | B-C-Bu-r-2   |                                  |                                 |                                 | 129.3                        |  |
|          | B-C-Bu-r-3   |                                  |                                 |                                 | 127.9                        |  |
|          | B-AR-NB-r-1  | AR<br><i>Erwinia gerundensis</i> | with bacteria                   | Nutrient Broth                  | 146.8                        |  |
|          | B-AR-NB-r-2  |                                  |                                 |                                 | 148.9                        |  |
|          | B-AR-NB-r-3  |                                  |                                 |                                 | 130.4                        |  |
|          | B-P25-NB-r-1 | S25<br><i>Paenibacillus</i> sp.  |                                 |                                 | 137.9                        |  |
|          | B-P25-NB-r-2 | Nutrient Broth                   |                                 | 93.53                           |                              |  |
|          | B-P25-NB-r-3 |                                  |                                 | 176.0                           |                              |  |
|          | B-P02-NB-r-1 |                                  |                                 | S02<br><i>Paenibacillus</i> sp. |                              |  |
|          | B-P02-NB-r-2 | Burk's N-free                    |                                 | 138.7                           |                              |  |
|          | B-P02-NB-r-3 |                                  |                                 | 165.3                           |                              |  |
|          | B-P02-Bu-r-1 |                                  |                                 | 97.64                           |                              |  |
|          | B-P02-Bu-r-2 |                                  |                                 | 92.52                           |                              |  |
|          | B-P02-Bu-r-3 |                                  |                                 | 79.52                           |                              |  |

Supplementary Table S2. Differentially expressed genes associated with chemotaxis of the three strains when barley seedlings were present

| Strain ID | Gene ID     | Annotation                          | Fold change |
|-----------|-------------|-------------------------------------|-------------|
| AR        | J9874_00382 |                                     | -2.33       |
|           | J9874_00704 |                                     | -2.33       |
|           | J9874_01195 |                                     | -1.93       |
|           | J9874_01334 | methyl-accepting chemotaxis protein | -1.53       |
|           | J9874_01896 |                                     | -1.84       |
|           | J9874_03604 |                                     | -3.00       |
|           | J9874_03627 |                                     | -1.90       |
|           | J9874_03746 |                                     | -1.73       |
|           | J9874_01893 | chemotaxis protein                  | -2.17       |
|           | J9874_01201 | flagellar motor switch protein      | 1.95        |
|           | J9874_01208 |                                     | 5.01        |
|           | J9874_01659 | sugar ABC transporter permease      | 1.57        |
| S02       | KAI36_01390 |                                     | 2.18        |
|           | KAI36_04010 | methyl-accepting chemotaxis protein | 2.05        |
|           | KAI36_03756 |                                     | 1.77        |
|           | KAI36_01945 |                                     | 1.73        |
|           | KAI36_02050 |                                     | 1.64        |
|           | KAI36_04625 | chemotaxis protein                  | 2.09        |
|           | KAI36_02039 |                                     | 1.60        |
|           | KAI36_00103 |                                     | 1.50        |
|           | KAI36_02026 | flagellar motor switch protein      | -2.03       |
|           | KAI36_04651 | sugar efflux transporter            | 1.94        |
| S25       | KAI37_03945 |                                     | 3.90        |
|           | KAI37_01846 |                                     | 2.96        |
|           | KAI37_01348 |                                     | 2.89        |
|           | KAI37_02413 | methyl-accepting chemotaxis protein | 2.41        |
|           | KAI37_03955 |                                     | 2.25        |
|           | KAI37_03695 |                                     | 2.13        |
|           | KAI37_03201 |                                     | 1.84        |
|           | KAI37_01957 |                                     | -2.57       |
|           | KAI37_04513 | chemotaxis protein                  | -1.77       |
|           | KAI37_01947 |                                     | -1.85       |
|           | KAI37_00106 |                                     | -2.01       |
|           | KAI37_01934 | flagellar motor switch protein      | 1.57        |
|           | KAI37_04538 | sugar efflux transporter            | 2.17        |

AR: Novel *E. gerundensis* strainS02/S25: Novel *Paenibacillus* sp. strains

Supplementary Table S3. Differentially expressed genes associated with biofilm formation of the three strains when barley seedlings were present

| Strain ID | Gene ID     | Annotation                             | Fold change |
|-----------|-------------|----------------------------------------|-------------|
| AR        | J9874_00073 | cellulose biosynthesis                 | 1.98        |
|           | J9874_03135 | glycogen biosynthesis                  | 1.62        |
|           | J9874_03136 |                                        | 1.55        |
|           | J9874_00235 | exopolysaccharide biosynthesis protein | 2.77        |
| S02       | KAI36_02209 | glycogen biosynthesis                  | -2.62       |
|           | KAI36_02210 |                                        | -2.90       |
|           | KAI36_02211 |                                        | -2.40       |
|           | KAI36_01529 | exopolysaccharide biosynthesis protein | -1.69       |
|           | KAI36_02778 |                                        | 2.70        |
| S25       | KAI37_02201 | glycogen biosynthesis                  | 17.61       |
|           | KAI37_02202 |                                        | 11.66       |
|           | KAI37_02709 |                                        | 3.37        |
|           | KAI37_01490 | exopolysaccharide biosynthesis protein | -2.31       |

AR: Novel *E. gerundensis* strainS02/S25: Novel *Paenibacillus* sp. strainsSupplementary Table S4. Differentially expressed genes associated with biofilm formation of *Paenibacillus* sp. S02 compared to *Paenibacillus* sp. S25 when barley seedlings were absent

| Strain ID | Gene ID     | Annotation                             | Fold change |
|-----------|-------------|----------------------------------------|-------------|
| S02       | KAI36_02210 | glycogen biosynthesis                  | 39.39       |
|           | KAI36_02211 |                                        | 24.74       |
|           | KAI36_02209 |                                        | 33.13       |
|           | KAI36_02873 |                                        | 5.97        |
|           | KAI36_02871 |                                        | 7.05        |
|           | KAI36_02778 | exopolysaccharide biosynthesis protein | -3.54       |

S02: Novel *Paenibacillus* sp. strain

Supplementary Table S5. Differentially expressed genes associated with plant growth promotion of strain S02 and S25 when barley seedlings were present

| Trait                                | Gene Name             | S02         |             | S25         |             |
|--------------------------------------|-----------------------|-------------|-------------|-------------|-------------|
| Nitrogen fixation                    |                       | Gene ID     | Fold change | Gene ID     | Fold change |
|                                      | <i>nifB</i>           | KAI36_01039 | NDE         | KAI37_00991 | NDE         |
|                                      | <i>nifH</i>           | KAI36_01040 | -2.84       | KAI37_00992 | NDE         |
|                                      | <i>nifD</i>           | KAI36_01041 | -2.48       | KAI37_00993 | NDE         |
|                                      | <i>nifK</i>           | KAI36_01042 | -3.37       | KAI37_00994 | -2.23       |
|                                      | <i>nifE</i>           | KAI36_01043 | -3.38       | KAI37_00995 | -1.87       |
|                                      | <i>nifN</i>           | KAI36_01044 | -4.83       | KAI37_00996 | -2.18       |
|                                      | <i>nifX</i>           | KAI36_01045 | -4.79       | KAI37_00997 | NDE         |
|                                      | <i>hesA/moeB</i>      | KAI36_01046 | -3.61       | KAI37_00998 | NDE         |
|                                      | <i>nifV</i>           | KAI36_01047 | -2.45       | KAI37_00999 | NDE         |
| Phosphate solubilization             |                       |             |             |             |             |
|                                      | <i>gcd</i>            | KAI36_02793 | NDE         | KAI37_02644 | NDE         |
| Phosphonate cluster ( <i>phn</i> )   |                       |             |             |             |             |
|                                      | <i>phnA</i>           | KAI36_05309 | 2.27        | KAI37_05177 | NDE         |
|                                      | <i>phnB</i>           | KAI36_00880 | NDE         | KAI37_00854 | 2.75        |
|                                      | <i>phnC</i>           | KAI36_04607 | NDE         | KAI37_04494 | -2.78       |
|                                      | <i>phnD</i>           | KAI36_04606 | -1.54       | KAI37_04493 | -2.45       |
|                                      | <i>phnE</i>           | KAI36_04608 | NDE         | KAI37_04495 | NDE         |
|                                      | <i>phnW</i>           | KAI36_05275 | -3.31       | KAI37_05152 | NDE         |
|                                      | <i>phnX</i>           | KAI36_00485 | NDE         | KAI37_00496 | NDE         |
|                                      | <i>ppd</i>            | KAI36_05276 | -2.73       | KAI37_05153 | NDE         |
|                                      | <i>pepM</i>           | KAI36_05277 | -2.00       | KAI37_05154 | NDE         |
| Phosphate transporter ( <i>pst</i> ) |                       |             |             |             |             |
|                                      | <i>pstS</i>           | KAI36_01689 | NDE         | KAI37_01595 | -5.91       |
|                                      | <i>pstA</i>           | KAI36_01691 | -1.79       | KAI37_01597 | -2.30       |
|                                      | <i>pstB</i>           | KAI36_01692 | -1.52       | KAI37_01598 | -3.51       |
|                                      | <i>pstC</i>           | KAI36_01690 | NDE         | KAI37_01596 | -2.19       |
|                                      | <i>phoP</i>           | KAI36_01703 | 1.73        | KAI37_01609 | NDE         |
|                                      | <i>phoR</i>           | KAI36_01702 | 1.54        | KAI37_01608 | 2.70        |
| Indole-3-acetic acid production      |                       |             |             |             |             |
|                                      | <i>ipdC</i>           | KAI36_01475 | NDE         | KAI37_01435 | NDE         |
|                                      | auxin efflux carriers | KAI36_02845 | NDE         | KAI37_02683 | NDE         |
|                                      |                       | KAI36_03330 | NDE         | KAI37_03351 | -2.65       |
|                                      |                       | KAI36_05253 | 2.34        | KAI37_05129 | 986.13      |

S02/S25: Novel *Paenibacillus* sp. strains

NDE: Not differentially expressed

Supplementary Table S6. Differentially expressed genes associated with biological nitrogen fixation of strain S02 when barley seedlings were present (in Burk's N-free medium)

| Strain ID | Gene ID     | Annotation                | Fold change |
|-----------|-------------|---------------------------|-------------|
| S02       | KAI36_01039 | <i>nifB</i>               | 7.34        |
|           | KAI36_01040 | <i>nifH</i>               | 10.50       |
|           | KAI36_01041 | <i>nifD</i>               | 11.12       |
|           | KAI36_01042 | <i>nifK</i>               | 8.54        |
|           | KAI36_01043 | <i>nifE</i>               | 10.86       |
|           | KAI36_01044 | <i>nifN</i>               | 6.07        |
|           | KAI36_01045 | <i>nifX</i>               | NDE         |
|           | KAI36_01046 | <i>hesA/moeB</i>          | NDE         |
|           | KAI36_01047 | <i>nifV</i>               | 4.13        |
|           | KAI36_03691 | molybdate-binding protein | 4.27        |
|           | KAI36_03812 |                           | 7.22        |

S02: Novel *Paenibacillus* sp. strain

NDE: Not differentially expressed

Supplementary Table S7. Differentially expressed genes associated with plant growth promotion of strain AR when barley seedlings were present

| Strain ID | Gene ID     | Annotation                                           | Fold change |
|-----------|-------------|------------------------------------------------------|-------------|
| AR        | J9874_03437 | phosphate transporter ( <i>pstS</i> )                | NDE         |
|           | J9874_03438 | phosphate transporter ( <i>pstC</i> )                | NDE         |
|           | J9874_03439 | phosphate transporter ( <i>pstA</i> )                | -1.61       |
|           | J9874_03440 | phosphate transporter ( <i>pstB</i> )                | -1.73       |
|           | J9874_03441 | phosphate transport system regulator ( <i>phoU</i> ) | NDE         |
|           | J9874_02162 | auxin efflux carriers                                | -1.54       |

AR: Novel *E. gerundensis* strain

NDE: Not differentially expressed

Supplementary Table S8. Differentially expressed core biosynthetic genes of secondary metabolite gene clusters of strain S02 and S25 when barley seedlings were present

| ID  | Type                   | Most similar known cluster (similarity) | S02         |             | S25         |             |
|-----|------------------------|-----------------------------------------|-------------|-------------|-------------|-------------|
|     |                        |                                         | Gene ID     | Fold change | Gene ID     | Fold change |
| C1  | Nrps                   | fusaricidin B (100%)                    | KAI36_00078 | NDE         | KAI37_00078 | NDE         |
|     |                        |                                         | KAI36_00083 | -2.50       | KAI37_00083 | -3.44       |
| C2  | siderophore            | N/A                                     | KAI36_00955 | NDE         | KAI37_00927 | 3.71        |
|     |                        |                                         | KAI36_00956 | NDE         | KAI37_00928 | 4.23        |
|     |                        |                                         | KAI36_00959 | 1.50        | KAI37_00931 | NDE         |
| C3  | bacteriocin            | N/A                                     | KAI36_01103 | 1.51        | KAI37_01049 | 4.07        |
| C4  | Nrps transAT-PKS       | N/A                                     | KAI36_01166 | -1.75       | KAI37_01130 | -1.63       |
|     |                        |                                         | KAI36_01170 | -1.82       | KAI37_01134 | 2.35        |
|     |                        |                                         | KAI36_01172 | -2.03       | KAI37_01136 | NDE         |
|     |                        |                                         | KAI36_01173 | -1.58       | KAI37_01137 | NDE         |
|     |                        |                                         | KAI36_01175 | NDE         | KAI37_01139 | NDE         |
|     |                        |                                         | KAI36_01176 | NDE         | KAI37_01140 | NDE         |
|     |                        |                                         | KAI36_01178 | -2.72       | KAI37_01142 | NDE         |
|     |                        |                                         | KAI36_01179 | -2.04       | KAI37_01143 | NDE         |
|     |                        |                                         | KAI36_01180 | -2.52       | KAI37_01144 | -2.32       |
|     |                        |                                         | KAI36_01181 | -2.17       | KAI37_01145 | -2.27       |
| C5  | lassopeptide           | paeninodin (40%)                        | KAI36_01236 | -1.58       | KAI37_01200 | NDE         |
|     |                        |                                         | KAI36_01240 | -1.69       | KAI37_01204 | NDE         |
| C6  | Nrps                   | marthiapeptide A (33%)                  | KAI36_01339 | NDE         | KAI37_01293 | 6.70        |
|     |                        |                                         | KAI36_01340 | NDE         | KAI37_01294 | 3.00        |
|     |                        |                                         | KAI36_01341 | -2.23       | KAI37_01295 | 2.61        |
| C7  | lanthipeptide          | paenilan (100%)                         | KAI36_01558 | NDE         | KAI37_01518 | NDE         |
|     |                        |                                         | KAI36_01560 | NDE         | KAI37_01520 | 2.73        |
|     |                        |                                         | KAI36_01562 | NDE         | KAI37_01522 | NDE         |
| C8  | lanthipeptide          | paenicidin B (71%)                      |             |             | KAI37_01661 | -2.25       |
|     |                        |                                         |             |             | KAI37_01663 | -1.67       |
| C9  | Nrps-like              | N/A                                     | KAI36_01944 | 1.60        | KAI37_01854 | -1.52       |
| C10 | Nrps                   | tridecaptin (100%)                      | KAI36_02333 | 1.55        | KAI37_02322 | -2.89       |
|     |                        |                                         | KAI36_02334 | NDE         | KAI37_02323 | NDE         |
| C11 | Nrps transAT-PKS       | paenilipoheptin (S02, 73%; S25, 76%)    | KAI36_02506 | 2.53        | KAI37_02476 | 12.81       |
|     |                        |                                         | KAI36_02507 | NDE         | KAI37_02477 | 13.60       |
|     |                        |                                         | KAI36_02508 | 1.90        | KAI37_02478 | 2.41        |
|     |                        |                                         | KAI36_02509 | 2.09        | KAI37_02479 | 1.59        |
|     |                        |                                         | KAI36_02510 | 1.74        | KAI37_02480 | NDE         |
| C12 | Nrps                   | N/A                                     |             |             | KAI37_02516 | -2.69       |
| C13 | Nrps betalactone       | N/A                                     |             |             | KAI37_02623 | NDE         |
|     |                        |                                         |             |             | KAI37_02624 | 1.87        |
|     |                        |                                         |             |             | KAI37_02633 | -1.92       |
| C14 | Nrps T3PKS transAT-PKS | aurantinin B/C/D (35%)                  | KAI36_03362 | NDE         | KAI37_03372 | NDE         |
|     |                        |                                         | KAI36_03363 | NDE         | KAI37_03373 | NDE         |
|     |                        |                                         | KAI36_03365 | NDE         | KAI37_03375 | NDE         |
|     |                        |                                         | KAI36_03366 | -2.23       | KAI37_03376 | NDE         |
|     |                        |                                         | KAI36_03367 | NDE         | KAI37_03377 | -2.62       |
|     |                        |                                         | KAI36_03368 | NDE         | KAI37_03378 | -1.90       |
|     |                        |                                         | KAI36_03371 | 1.65        | KAI37_03381 | NDE         |
|     |                        |                                         | KAI36_03372 | NDE         | KAI37_03382 | -2.77       |
| C15 | Nrps                   | polymyxin (100%)                        | KAI36_04684 | 1.57        | KAI37_04566 | -2.34       |
|     |                        |                                         | KAI36_04687 | 1.74        | KAI37_04567 | -1.63       |
|     |                        |                                         | KAI36_04688 | 1.53        | KAI37_04570 | NDE         |
|     |                        |                                         |             |             | KAI37_04571 | NDE         |
| C16 | phosphonate            | N/A                                     | KAI36_05277 | -2.00       | KAI37_05154 | NDE         |

S02/S25: Novel *Paenibacillus* sp. strains

NDE: not differentially expressed; Clusters in blue: known antimicrobial compounds

Supplementary Table S9. Differentially expressed core biosynthetic genes of secondary metabolite gene clusters of strain S02 when barley seedlings were present (in Burk's N-free medium)

| ID  | Type                         | Most similar known cluster<br>(similarity) | S02         |             |
|-----|------------------------------|--------------------------------------------|-------------|-------------|
|     |                              |                                            | Gene ID     | Fold change |
| C1  | Nrps                         | fusaricidin B (100%)                       | KAI36_00078 | 4.94        |
|     |                              |                                            | KAI36_00083 | 8.31        |
| C2  | siderophore                  | N/A                                        | KAI36_00955 | NDE         |
|     |                              |                                            | KAI36_00956 | NDE         |
|     |                              |                                            | KAI36_00959 | -2.42       |
| C3  | bacteriocin                  | N/A                                        | KAI36_01103 | NDE         |
|     |                              |                                            | KAI36_01166 | 53.46       |
| C4  | Nrps<br>transAT-PKS          | N/A                                        | KAI36_01170 | 236.34      |
|     |                              |                                            | KAI36_01172 | 269.16      |
|     |                              |                                            | KAI36_01173 | 247.75      |
|     |                              |                                            | KAI36_01175 | 244.58      |
|     |                              |                                            | KAI36_01176 | 174.31      |
|     |                              |                                            | KAI36_01178 | 134.82      |
|     |                              |                                            | KAI36_01179 | 79.06       |
|     |                              |                                            | KAI36_01180 | 75.55       |
|     |                              |                                            | KAI36_01181 | 51.95       |
| C5  | lassopeptide                 | paeninodin (40%)                           | KAI36_01236 | 2.96        |
|     |                              |                                            | KAI36_01240 | NDE         |
| C6  | Nrps                         | marthiapeptide A (33%)                     | KAI36_01339 | 84.91       |
|     |                              |                                            | KAI36_01340 | 60.46       |
|     |                              |                                            | KAI36_01341 | 48.96       |
| C7  | lanthipeptide                | paenilan (100%)                            | KAI36_01558 | 7.22        |
|     |                              |                                            | KAI36_01560 | 12.29       |
|     |                              |                                            | KAI36_01562 | 11.36       |
| C9  | Nrps-like                    | N/A                                        | KAI36_01944 | NDE         |
| C10 | Nrps                         | tridecaptin (100%)                         | KAI36_02333 | 4.20        |
|     |                              |                                            | KAI36_02334 | 5.36        |
| C11 | Nrps<br>transAT-PKS          | paenilipoheptin<br>(S02, 73%; S25, 76%)    | KAI36_02506 | NDE         |
|     |                              |                                            | KAI36_02507 | 3.21        |
|     |                              |                                            | KAI36_02508 | 4.95        |
|     |                              |                                            | KAI36_02509 | 7.65        |
|     |                              |                                            | KAI36_02510 | 5.29        |
| C14 | Nrps<br>T3PKS<br>transAT-PKS | aurantinin B/C/D (35%)                     | KAI36_03362 | 4.72        |
|     |                              |                                            | KAI36_03363 | 17.63       |
|     |                              |                                            | KAI36_03365 | 10.78       |
|     |                              |                                            | KAI36_03366 | 8.93        |
|     |                              |                                            | KAI36_03367 | 8.27        |
|     |                              |                                            | KAI36_03368 | 9.10        |
|     |                              |                                            | KAI36_03371 | 4.62        |
|     |                              |                                            | KAI36_03372 | 6.49        |
| C15 | Nrps                         | polymyxin (100%)                           | KAI36_04684 | 3.80        |
|     |                              |                                            | KAI36_04687 | 2.89        |
|     |                              |                                            | KAI36_04688 | 2.12        |
| C16 | phosphonate                  | N/A                                        | KAI36_05277 | NDE         |

S02: Novel *Paenibacillus* sp. strain

NDE: Not differentially expressed

Clusters in blue: Known antimicrobial compounds

Supplementary Table S10. Differentially expressed core biosynthetic genes of secondary metabolite gene clusters of strain AR when barley seedlings were present

| ID | Type                                 | Most similar known cluster (similarity) | AR          |             |
|----|--------------------------------------|-----------------------------------------|-------------|-------------|
|    |                                      |                                         | Gene ID     | Fold change |
| C1 | linear azol(in)e-containing peptides | N/A                                     | J9874_01604 | NDE         |
|    |                                      |                                         | J9874_01622 | NDE         |
| C2 | arylpolyene hserlactone              | aryl polyenes (88%)                     | J9874_01995 | NDE         |
|    |                                      |                                         | J9874_01998 | NDE         |
|    |                                      |                                         | J9874_02030 | NDE         |
| C3 | thiopeptide                          | N/A                                     | J9874_02102 | NDE         |
|    |                                      |                                         | J9874_02105 | -1.85       |
| C4 | Nrps                                 | N/A                                     | J9874_02933 | NDE         |
|    |                                      |                                         | J9874_02940 | -1.54       |
| C5 | terpene                              | carotenoid (100%)                       | J9874_03208 | 1.55        |
|    |                                      |                                         | J9874_03210 | 2.37        |
| C6 | hserlactone                          | N/A                                     | J9874_03481 | NDE         |
| C7 | siderophore                          | N/A                                     | J9874_03599 | NDE         |
|    |                                      |                                         | J9874_03601 | NDE         |

AR: Novel *E. gerundensis* strain

NDE: Not differentially expressed

Supplementary Table S11. Differentially expressed transcripts encoding disease resistance proteins and heat shock proteins in barley seedlings when the three bacterial strains were present

| Strain ID                     | Annotation                  | No. of upregulated transcripts | No. of downregulated transcripts |
|-------------------------------|-----------------------------|--------------------------------|----------------------------------|
| AR                            | Disease resistance proteins | 84                             | 96                               |
|                               | Heat shock proteins         | 31                             | 12                               |
| S02                           | Disease resistance proteins | 39                             | 41                               |
|                               | Heat shock proteins         | 12                             | 9                                |
| S25                           | Disease resistance proteins | 64                             | 103                              |
|                               | Heat shock proteins         | 24                             | 17                               |
| S02 (in Burk's N-free medium) | Disease resistance proteins | 58                             | 35                               |
|                               | Heat shock proteins         | 32                             | 6                                |

AR: Novel *E. gerundensis* strainS02/S25: Novel *Paenibacillus* sp. strains



Supplementary Table S12. Differentially expressed transcripts associated with defence and stress responses in barley seedlings when the three bacterial strains were present

| Strain ID                              | Transcript ID      | Annotation                               | Fold change |
|----------------------------------------|--------------------|------------------------------------------|-------------|
| AR                                     | BART1_0-p09460.001 | leucine-rich receptor kinase             | 1.75        |
|                                        | BART1_0-p51301.001 | polygalacturonase inhibitor              | 6.36        |
|                                        | BART1_0-p07261.001 | xylanase inhibitor                       | 145.89      |
|                                        | BART1_0-p50355.001 |                                          | 8.76        |
|                                        | BART1_0-p52030.004 | caffeoyl CoA <i>O</i> -methyltransferase | -12.71      |
|                                        | BART1_0-p52031.001 |                                          | 3.49        |
|                                        | BART1_0-p12652.001 |                                          | 48.58       |
|                                        | BART1_0-p12655.001 |                                          | 2.80        |
|                                        | BART1_0-p17187.003 | glutamate decarboxylase                  | 2.43        |
|                                        | BART1_0-p17187.004 |                                          | 1.81        |
|                                        | BART1_0-p30229.001 |                                          | 6.77        |
|                                        | BART1_0-p08022.001 |                                          | 1.89        |
|                                        | BART1_0-p35458.001 | ubiquitin-activating enzyme E1           | 1.65        |
|                                        | BART1_0-p35458.005 |                                          | 2.24        |
|                                        | BART1_0-p35458.009 |                                          | 1.61        |
|                                        | BART1_0-p14610.004 |                                          | -40.11      |
|                                        | BART1_0-p14611.002 | ascorbate peroxidase                     | 43.98       |
|                                        | BART1_0-p14611.004 |                                          | 38.10       |
| S02                                    | BART1_0-p59228.001 | leucine-rich receptor kinase             | -2.87       |
|                                        | BART1_0-p09955.001 | polygalacturonase inhibitor              | -13.96      |
|                                        | BART1_0-p50356.001 | caffeoyl CoA <i>O</i> -methyltransferase | -33.51      |
|                                        | BART1_0-p30229.001 | glutamate decarboxylase                  | 8.31        |
|                                        | BART1_0-p35458.005 |                                          | 1.55        |
|                                        | BART1_0-p35458.008 | ubiquitin-activating enzyme E1           | -163.22     |
|                                        | BART1_0-p35458.009 |                                          | 1.61        |
| S25                                    | BART1_0-p09955.001 | polygalacturonase inhibitor              | -6.43       |
|                                        | BART1_0-p15038.001 |                                          | -3.57       |
|                                        | BART1_0-p37179.001 | caffeoyl CoA <i>O</i> -methyltransferase | -2.80       |
|                                        | BART1_0-p52031.001 |                                          | 2.75        |
|                                        | BART1_0-p12655.001 |                                          | -2.31       |
|                                        | BART1_0-p17187.003 |                                          | 2.72        |
|                                        | BART1_0-p17187.005 | glutamate decarboxylase                  | 2.32        |
|                                        | BART1_0-p17187.011 |                                          | -625.82     |
|                                        | BART1_0-p26684.001 |                                          | 42.12       |
|                                        | BART1_0-p30229.001 |                                          | -1.85       |
|                                        | BART1_0-p08024.002 | ubiquitin-activating enzyme E1           | -2.45       |
|                                        | BART1_0-p35458.001 |                                          | 1.75        |
| S02<br>(in Burk's<br>N-free<br>medium) | BART1_0-p09955.001 | polygalacturonase inhibitor              | -13.96      |
|                                        | BART1_0-p09460.001 | leucine-rich receptor kinase             | -1.90       |
|                                        | BART1_0-p59228.001 |                                          | -6.26       |
|                                        | BART1_0-p37179.001 |                                          | -2.82       |
|                                        | BART1_0-p52030.001 | caffeoyl CoA <i>O</i> -methyltransferase | -3.26       |
|                                        | BART1_0-p52030.003 |                                          | -4.90       |
|                                        | BART1_0-p52031.001 |                                          | -4.06       |
|                                        | BART1_0-p12654.004 |                                          | 37.48       |
|                                        | BART1_0-p12654.006 |                                          | 93.49       |
|                                        | BART1_0-p12655.001 | glutamate decarboxylase                  | 2.93        |
|                                        | BART1_0-p17187.004 |                                          | -2.14       |
|                                        | BART1_0-p26684.001 |                                          | -3.17       |
|                                        | BART1_0-p30229.001 |                                          | 4.56        |
|                                        | BART1_0-p08022.001 |                                          | -1.74       |
|                                        | BART1_0-p27782.001 | ubiquitin-activating enzyme E1           | -1.62       |
|                                        | BART1_0-p29625.001 |                                          | -1.70       |

AR: Novel *E. gerundensis* strain; S02/S25: Novel *Paenibacillus* sp. strains

Supplementary Table S13. Differentially expressed transcripts encoding endoglucanase in barley seedlings when the three bacterial strains were present

| Strain ID | Transcript ID      | Fold change | Strain ID                              | Transcript ID      | Fold change |
|-----------|--------------------|-------------|----------------------------------------|--------------------|-------------|
| AR        | BART1_0-p02416.002 | 2.74        | S02                                    | BART1_0-p05997.001 | -3.67       |
|           | BART1_0-p13013.001 | 1.89        |                                        | BART1_0-p19258.001 | -2.11       |
|           | BART1_0-p13221.001 | 1.56        |                                        | BART1_0-p38044.001 | -1.55       |
|           | BART1_0-p13221.002 | 7.07        |                                        | BART1_0-p50607.001 | -12.19      |
|           | BART1_0-p13221.003 | 2.03        |                                        | BART1_0-p53733.001 | -2.32       |
|           | BART1_0-p13224.001 | 8.98        |                                        | BART1_0-p55128.003 | -1.55       |
|           | BART1_0-p16546.001 | -51.59      | S02<br>(in Burk's<br>N-free<br>medium) | BART1_0-p02416.002 | 2.02        |
|           | BART1_0-p26867.004 | -169.13     |                                        | BART1_0-p05997.001 | -13.56      |
|           | BART1_0-p35786.001 | -2.70       |                                        | BART1_0-p13059.001 | -5.57       |
|           | BART1_0-p35791.001 | 138171.33   |                                        | BART1_0-p13221.001 | -2.83       |
|           | BART1_0-p36297.001 | 134.32      |                                        | BART1_0-p13221.003 | -1.89       |
|           | BART1_0-p36298.001 | 180.65      |                                        | BART1_0-p16188.001 | -13.24      |
|           | BART1_0-p36300.001 | 110.53      |                                        | BART1_0-p19258.001 | -8.17       |
|           | BART1_0-p37935.001 | 2.97        |                                        | BART1_0-p35786.001 | -15.32      |
|           | BART1_0-p37939.001 | 25.44       |                                        | BART1_0-p37930.001 | -30.63      |
|           | BART1_0-p38044.002 | -137.95     |                                        | BART1_0-p38044.001 | -1.70       |
|           | BART1_0-p38044.019 | -174.56     |                                        | BART1_0-p43284.001 | 260.24      |
|           | BART1_0-p42923.003 | -3.93       |                                        | BART1_0-p46514.001 | -3.19       |
|           | BART1_0-p42924.003 | 755.12      |                                        | BART1_0-p46758.001 | -1.60       |
|           | BART1_0-p42924.004 | 1275.61     |                                        | BART1_0-p51464.001 | -2.16       |
|           | BART1_0-p46758.001 | 1.88        |                                        | BART1_0-p51466.001 | -2.49       |
|           | BART1_0-p50604.001 | -198.34     |                                        | BART1_0-p53733.001 | -6.94       |
|           | BART1_0-p50609.001 | 16.40       |                                        | BART1_0-p55128.001 | 2.45        |
|           | BART1_0-p51464.001 | 1.50        | S25                                    |                    |             |
|           | BART1_0-p51464.002 | 2.21        |                                        |                    |             |
|           | BART1_0-p59306.001 | 35.34       |                                        |                    |             |
|           | BART1_0-p02416.002 | 2.43        |                                        |                    |             |
|           | BART1_0-p13013.001 | 1.65        |                                        |                    |             |
|           | BART1_0-p13059.001 | -2.21       |                                        |                    |             |
|           | BART1_0-p13221.002 | 4.85        |                                        |                    |             |
|           | BART1_0-p13224.001 | 15.77       |                                        |                    |             |
|           | BART1_0-p29302.001 | 1.62        |                                        |                    |             |
|           | BART1_0-p37930.001 | -109.68     |                                        |                    |             |
|           | BART1_0-p38044.001 | -1.50       |                                        |                    |             |
|           | BART1_0-p43284.001 | 272.20      |                                        |                    |             |
|           | BART1_0-p46514.001 | -7.18       |                                        |                    |             |
|           | BART1_0-p50604.001 | -196.79     |                                        |                    |             |
|           | BART1_0-p50607.001 | -150.94     |                                        |                    |             |
|           | BART1_0-p51464.002 | 3.10        |                                        |                    |             |
|           | BART1_0-p53733.001 | -6.40       |                                        |                    |             |
|           | BART1_0-p55128.003 | -1.60       |                                        |                    |             |
|           | BART1_0-p59304.001 | -62.31      |                                        |                    |             |

AR: Novel *E. gerundensis* strain  
S02/S25: Novel *Paenibacillus* sp. strains

Supplementary Table S14. Differentially expressed transcripts associated with signal transduction and ethylene biosynthesis in barley seedlings when the three bacterial strains were present

| Strain ID                              | Transcript ID      | Annotation                           | Fold change |
|----------------------------------------|--------------------|--------------------------------------|-------------|
| AR                                     | BART1_0-p22808.001 | ADP-ribosylation factor              | 2.03        |
|                                        | BART1_0-p32313.002 |                                      | 10670.18    |
|                                        | BART1_0-p32313.003 |                                      | 4579.19     |
|                                        | BART1_0-p32313.004 |                                      | 244.17      |
|                                        | BART1_0-p40410.001 |                                      | 1.58        |
|                                        | BART1_0-p59482.001 |                                      | 1.98        |
|                                        | BART1_0-p59482.003 | GTP-binding proteins                 | 1.89        |
|                                        | BART1_0-p27744.001 |                                      | -57.23      |
|                                        | BART1_0-p35339.001 |                                      | 310.46      |
|                                        | BART1_0-p36228.006 |                                      | -2.52       |
|                                        | BART1_0-p38804.001 |                                      | 1.60        |
|                                        | BART1_0-p38805.001 |                                      | 78.48       |
|                                        | BART1_0-p38805.002 |                                      | 138.92      |
|                                        | BART1_0-p27326.001 | aminocyclopropanecarboxylate oxidase | -72.03      |
|                                        | BART1_0-p27327.002 |                                      | -2.83       |
| S02                                    | BART1_0-p22808.001 | ADP-ribosylation factor              | 1.56        |
|                                        | BART1_0-p22808.009 |                                      | 1.72        |
|                                        | BART1_0-p27743.001 | GTP-binding proteins                 | 3.88        |
|                                        | BART1_0-p36228.006 |                                      | -1.84       |
|                                        | BART1_0-p27326.001 | aminocyclopropanecarboxylate oxidase | -3.70       |
|                                        | BART1_0-p27327.001 |                                      | 2.64        |
| S25                                    | BART1_0-p22808.001 | ADP-ribosylation factor              | 1.75        |
|                                        | BART1_0-p42864.001 |                                      | 1.61        |
|                                        | BART1_0-p59482.001 |                                      | 1.63        |
|                                        | BART1_0-p59482.003 |                                      | 1.66        |
|                                        | BART1_0-p59482.006 |                                      | 2.86        |
|                                        | BART1_0-p27743.001 | GTP-binding proteins                 | 2.53        |
|                                        | BART1_0-p38805.001 |                                      | 19.51       |
|                                        | BART1_0-p27326.001 | aminocyclopropanecarboxylate oxidase | -314.69     |
|                                        | BART1_0-p27327.002 |                                      | -15.25      |
| S02<br>(in Burk's<br>N-free<br>medium) | BART1_0-p40410.004 | ADP-ribosylation factor              | -30.77      |
|                                        | BART1_0-p59482.002 |                                      | 26.67       |
|                                        | BART1_0-p59482.003 |                                      | 1.61        |
|                                        | BART1_0-p36228.001 | GTP-binding proteins                 | -1.79       |
|                                        | BART1_0-p27326.001 | aminocyclopropanecarboxylate oxidase | -9.00       |

AR: Novel *E. gerundensis* strainS02/S25: Novel *Paenibacillus* sp. strains

Supplementary Table S15. Differentially expressed transcripts encoding high affinity transporters in barley seedlings when the three bacterial strains were present

| Strain ID | Transcript ID      | Fold change        | Strain ID                                                                                 | Transcript ID      | Fold change                       |                    |                    |
|-----------|--------------------|--------------------|-------------------------------------------------------------------------------------------|--------------------|-----------------------------------|--------------------|--------------------|
| AR        | nitrate            | BART1_0-p42069.001 | -92.78                                                                                    | S02                | BART1_0-p40717.001                | -1.69              |                    |
|           |                    | BART1_0-p42070.001 | -324.24                                                                                   |                    | BART1_0-p42069.001                | -150.75            |                    |
|           |                    | BART1_0-p42072.001 | 9.36                                                                                      |                    | BART1_0-p42070.001                | -71.16             |                    |
|           |                    | BART1_0-p42073.001 | -41.16                                                                                    |                    | BART1_0-p42073.001                | -9.55              |                    |
|           |                    | BART1_0-p42077.001 | 128.40                                                                                    |                    | BART1_0-p42079.001                | 2.65               |                    |
|           |                    | BART1_0-p42082.001 | 41.67                                                                                     |                    | BART1_0-p42084.001                | -7.89              |                    |
|           |                    | BART1_0-p55377.001 | -80.43                                                                                    |                    | BART1_0-p42092.001                | -31.39             |                    |
|           |                    | BART1_0-p40717.001 | -10.69                                                                                    |                    | BART1_0-p42093.001                | -11.37             |                    |
|           |                    | BART1_0-p45131.001 | -5.72                                                                                     |                    | BART1_0-p45131.001                | -2.35              |                    |
|           | iron               | BART1_0-p53866.001 | 1.83                                                                                      |                    | BART1_0-p40717.001                | -1.69              |                    |
|           |                    | potassium          | BART1_0-p14481.001                                                                        |                    | 8.05                              | iron               | BART1_0-p53866.001 |
|           | BART1_0-p14481.002 |                    | 8.40                                                                                      |                    | potassium                         | BART1_0-p59179.001 | -1.72              |
|           | BART1_0-p14476.001 |                    | 2.46                                                                                      |                    | sulphate                          | BART1_0-p30667.002 | -8.88              |
|           | BART1_0-p59178.002 |                    | 37.21                                                                                     |                    |                                   | BART1_0-p30667.004 | -3.70              |
|           | sulphate           | BART1_0-p30667.002 | -93.09                                                                                    |                    |                                   | BART1_0-p30667.005 | -4.61              |
|           |                    | BART1_0-p30667.004 | -12.07                                                                                    |                    |                                   | BART1_0-p30670.001 | 3.29               |
|           |                    | BART1_0-p30667.005 | -18.58                                                                                    |                    | inorganic phosphate               | BART1_0-p31346.001 | -15.73             |
|           |                    | BART1_0-p30667.006 | -493.77                                                                                   |                    |                                   | BART1_0-p31572.001 | -18.34             |
|           |                    | BART1_0-p30667.007 | -37.07                                                                                    |                    | S02<br>(in Burk' s N-free medium) | BART1_0-p42069.001 | -193.11            |
| S25       | BART1_0-p42069.001 | -126.57            | BART1_0-p42070.001                                                                        | -97.43             |                                   |                    |                    |
|           | BART1_0-p42070.001 | -478.53            | BART1_0-p42078.001                                                                        | -2.13              |                                   |                    |                    |
|           | BART1_0-p42072.001 | -17.42             | BART1_0-p42079.001                                                                        | -909.93            |                                   |                    |                    |
|           | nitrate            | BART1_0-p42073.001 | -123.42                                                                                   | BART1_0-p42084.001 |                                   | -650.54            |                    |
|           |                    | BART1_0-p42079.001 | -321.70                                                                                   | BART1_0-p42092.001 |                                   | -983.39            |                    |
|           |                    | BART1_0-p42084.001 | -2.22                                                                                     | BART1_0-p42093.001 |                                   | -143.76            |                    |
|           |                    | BART1_0-p42092.001 | -5.27                                                                                     | BART1_0-p45131.001 |                                   | -2.53              |                    |
|           |                    | BART1_0-p42093.001 | -6.37                                                                                     | BART1_0-p45134.001 |                                   | -3.99              |                    |
|           |                    | BART1_0-p55377.001 | -201.97                                                                                   | potassium          |                                   | BART1_0-p14476.001 | -2.48              |
|           |                    | BART1_0-p40717.001 | -11.20                                                                                    |                    |                                   | BART1_0-p59179.001 | 4.17               |
|           |                    | BART1_0-p45131.001 | -4.93                                                                                     | sulphate           |                                   | BART1_0-p30667.002 | -30.78             |
|           |                    | potassium          | BART1_0-p14481.001                                                                        |                    |                                   | 19.52              | BART1_0-p30667.004 |
|           | BART1_0-p14481.002 |                    | 19.05                                                                                     |                    |                                   | BART1_0-p30668.001 | 3.26               |
|           | BART1_0-p14476.001 |                    | 4.60                                                                                      |                    |                                   | BART1_0-p30670.001 | -12.50             |
|           | BART1_0-p59179.001 |                    | 4.76                                                                                      | sulphate           |                                   | BART1_0-p30667.002 | -9.51              |
|           | BART1_0-p30667.002 | -9.51              | BART1_0-p30667.005                                                                        |                    |                                   | -5.13              |                    |
|           | BART1_0-p30667.005 | -5.13              | inorganic phosphate                                                                       |                    |                                   | BART1_0-p31346.001 | -514.99            |
|           | BART1_0-p31346.001 | -514.99            |                                                                                           | BART1_0-p31572.001 |                                   | -33.95             |                    |
|           | BART1_0-p31572.001 | -33.95             | AR: Novel <i>E. gerundensis</i> strain<br>S02/S25: Novel <i>Paenibacillus</i> sp. strains |                    |                                   |                    |                    |

Supplementary Table S16. Differentially expressed transcripts associated with nutrient uptake and metabolism in barley seedlings when the three bacterial strains were present

| Strain ID | Transcript ID      | Annotation                                   | Fold change |
|-----------|--------------------|----------------------------------------------|-------------|
| AR        | BART1_0-p04828.001 |                                              | -457.99     |
|           | BART1_0-p04829.001 |                                              | 160.67      |
|           | BART1_0-p40957.001 | ammonium transporter                         | -7.40       |
|           | BART1_0-p45407.001 |                                              | -3.08       |
|           | BART1_0-p58582.001 |                                              | -4.47       |
|           | BART1_0-p01562.001 |                                              | 91.46       |
|           | BART1_0-p01563.001 |                                              | 2.11        |
|           | BART1_0-p40352.001 |                                              | -2.30       |
|           | BART1_0-p50969.002 | anthocyanidin- <i>O</i> -glucosyltransferase | -6.28       |
|           | BART1_0-p38221.001 |                                              | 1.82        |
|           | BART1_0-p38224.001 |                                              | 174.97      |
|           | BART1_0-p22047.004 |                                              | 1063.42     |
|           | BART1_0-p26633.001 |                                              | 4.49        |
|           | BART1_0-p26633.002 |                                              | 2.51        |
|           | BART1_0-p26633.003 | glutamine synthetase                         | 6.65        |
|           | BART1_0-p26633.004 |                                              | 3.03        |
|           | BART1_0-p46549.002 |                                              | 1.89        |
|           | BART1_0-p46549.007 |                                              | 1.65        |
|           | BART1_0-p22331.001 |                                              | 4.74        |
|           | BART1_0-p22331.002 |                                              | 2.16        |
|           | BART1_0-p22331.008 | aspartate aminotransferase                   | 5.06        |
|           | BART1_0-p22331.011 |                                              | 23.73       |
|           | BART1_0-p22331.013 |                                              | 67.08       |
|           | BART1_0-p48209.001 |                                              | 2.80        |
|           | BART1_0-p48951.001 |                                              | 4.61        |
|           | BART1_0-p50918.003 | sucrose synthase                             | 2.69        |
|           | BART1_0-p50918.004 |                                              | 2.33        |
|           | BART1_0-p50919.002 |                                              | 2.20        |
|           | BART1_0-p04906.023 |                                              | 753.55      |
|           | BART1_0-p04906.031 | UDP-glucose pyrophosphorylase                | 2.71        |
| S02       | BART1_0-p04827.001 |                                              | 2.30        |
|           | BART1_0-p40957.001 | ammonium transporter                         | -3.21       |
|           | BART1_0-p58582.001 |                                              | -2.59       |
|           | BART1_0-p22331.001 |                                              | 2.69        |
|           | BART1_0-p22331.002 |                                              | 1.73        |
|           | BART1_0-p54667.001 | aspartate aminotransferase                   | 1.92        |
|           | BART1_0-p58839.006 |                                              | 3.27        |
|           | BART1_0-p58839.015 |                                              | 43.44       |
|           | BART1_0-p09325.001 |                                              | -3.05       |
|           | BART1_0-p50918.003 |                                              | 1.77        |
|           | BART1_0-p50918.013 | sucrose synthase                             | 2.35        |
|           | BART1_0-p50919.003 |                                              | -2.15       |
|           | BART1_0-p50919.018 |                                              | 1.72        |

## Supplementary Tables

|                                        |                    |                            |        |
|----------------------------------------|--------------------|----------------------------|--------|
| S25                                    | BART1_0-p04828.001 |                            | -5.66  |
|                                        | BART1_0-p40957.001 | ammonium transporter       | -8.34  |
|                                        | BART1_0-p45407.001 |                            | -4.09  |
|                                        | BART1_0-p58582.001 |                            | -3.34  |
|                                        | BART1_0-p26633.001 |                            | 5.72   |
|                                        | BART1_0-p26633.002 |                            | 6.38   |
|                                        | BART1_0-p26633.003 |                            | 15.22  |
|                                        | BART1_0-p26633.004 |                            | 6.16   |
|                                        | BART1_0-p46549.001 | glutamine synthetase       | 1.92   |
|                                        | BART1_0-p46549.002 |                            | 3.87   |
|                                        | BART1_0-p46549.007 |                            | 2.84   |
|                                        | BART1_0-p46549.008 |                            | 2.77   |
|                                        | BART1_0-p46549.010 |                            | 3.18   |
|                                        | BART1_0-p22331.001 |                            | 3.56   |
|                                        | BART1_0-p22331.002 |                            | 1.57   |
|                                        | BART1_0-p22331.007 |                            | 4.84   |
|                                        | BART1_0-p22331.008 | aspartate aminotransferase | 6.08   |
|                                        | BART1_0-p22331.011 |                            | 12.17  |
|                                        | BART1_0-p58839.001 |                            | -2.42  |
|                                        | BART1_0-p58839.015 |                            | 57.59  |
|                                        | BART1_0-p48209.001 |                            | 1.88   |
|                                        | BART1_0-p48951.001 |                            | 4.45   |
|                                        | BART1_0-p48951.009 |                            | 4.64   |
|                                        | BART1_0-p50918.013 | sucrose synthase           | 3.53   |
|                                        | BART1_0-p50918.016 |                            | 30.21  |
|                                        | BART1_0-p50919.002 |                            | 2.70   |
| S02<br>(in Burk's<br>N-free<br>medium) | BART1_0-p23459.001 |                            | -3.47  |
|                                        | BART1_0-p40957.001 | ammonium transporter       | -9.80  |
|                                        | BART1_0-p45407.001 |                            | -16.10 |
|                                        | BART1_0-p46549.007 | glutamine synthetase       | 2.37   |
|                                        | BART1_0-p22331.001 |                            | 3.14   |
|                                        | BART1_0-p22331.002 |                            | 1.91   |
|                                        | BART1_0-p22331.011 | aspartate aminotransferase | 3.57   |
|                                        | BART1_0-p54667.001 |                            | -2.16  |
|                                        | BART1_0-p55159.001 |                            | 7.04   |
|                                        | BART1_0-p50918.004 |                            | -2.12  |
|                                        | BART1_0-p50918.013 | sucrose synthase           | 1.90   |
|                                        | BART1_0-p50919.017 |                            | 30.36  |

AR: Novel *E. gerundensis* strain

S02/S25: Novel *Paenibacillus* sp. strains
